# Supplementary material for: Nuclear quadrupole resonance supported by periodic quantum calculations: a sensitive tool for precise structural characterization of short hydrogen bonds
Source: Royal Society of Chemistry journal article supplement (doi:10.1039/d0cp04710d), 2020-01-01
Supplement: d0cp04710d1.pdf [file d0cp04710d1.pdf]

**Nuclear quadrupole resonance supported by periodic quantum calculations: a sensitive tool for precise structural characterization of short hydrogen bonds.**

*Jernej Stare, Anton Gradišek, Janez Seliger*

**SUPPLEMENTARY INFORMATION**

**Gas phase model: impact of basis set and model Hamiltonian on computed NQCC values.** In Table S1 and S2 are listed NQCC values computed with different basis sets and model chemistries (B3LYP vs. MP2). These calculations are performed on an isolated PANO molecule frozen in the experimental geometry measured by ND (ref. 18 in the text). Since this model completely disregards the effects of crystalline environment, its use is limited to the testing of computational settings. The tabulated results are briefly discussed in Section 3.2.

**Table S1.** NQCC values for selected PANO atoms (see Fig. 1) calculated with different basis sets with the B3LYP functional for an isolated PANO molecule in the experimental geometry. Experimental values are also listed.

| Basis set        | NQCC [kHz] |                  |                  | 6-311G(2d,2p)     | 1558        | 7345        | 17382        |
|------------------|------------|------------------|------------------|-------------------|-------------|-------------|--------------|
|                  | N          | O <sub>don</sub> | O <sub>acc</sub> |                   |             |             |              |
| 6-31G            | 1316       | 7507             | 16739            | 6-311G(3d,3p)     | 1588        | 7158        | 17292        |
| 6-31G(d)         | 1365       | 6882             | 15777            | 6-311G(3df,3pd)   | 1514        | 7008        | 17015        |
| 6-31G(d,p)       | 1358       | 6858             | 15831            | 6-311+G(d,p)      | 1667        | 7140        | 17238        |
| 6-31G(2d,2p)     | 1324       | 6599             | 15675            | 6-311++G(d,p)     | 1667        | 7140        | 17274        |
| 6-31G(3d,3p)     | 1421       | 6641             | 15747            | 6-311++G(3df,3pd) | 1572        | 6870        | 16793        |
| 6-31G(3df,3pd)   | 1368       | 6557             | 15627            | cc-pVDZ           | 1252        | 7050        | 16204        |
| 6-31+G(d,p)      | 1468       | 6720             | 15729            | cc-pVTZ           | 1486        | 6972        | 16907        |
| 6-31++G(d,p)     | 1471       | 6720             | 15735            | cc-pVQZ           | 1580        | 6978        | 17088        |
| 6-31++G(3df,3pd) | 1401       | 6383             | 15465            | cc-pV5Z           | 1606        | 7002        | 17166        |
| 6-311G           | 1789       | 8745             | 18662            | aug-cc-pVDZ       | 1464        | 6629        | 15885        |
| 6-311G(d)        | 1605       | 7453             | 17532            | aug-cc-pVTZ       | 1522        | 6828        | 16739        |
| 6-311G(d,p)      | 1595       | 7417             | 17538            | aug-cc-pVQZ       | 1587        | 6918        | 17015        |
|                  |            |                  |                  | <b>EXP.</b>       | <b>1886</b> | <b>6470</b> | <b>15320</b> |

**Table S2.** NQCC values computed by the B3LYP and MP2 method and several basis sets for selected atoms of an isolated PANO molecule in the experimental geometry. Experimental NQCC values are also listed.

| Basis set         | NQCC [kHz]  |      |                  |      |                  |       |
|-------------------|-------------|------|------------------|------|------------------|-------|
|                   | N           |      | O <sub>don</sub> |      | O <sub>acc</sub> |       |
|                   | B3LYP       | MP2  | B3LYP            | MP2  | B3LYP            | MP2   |
| 6-31G(d,p)        | 1358        | 1256 | 6858             | 6305 | 15831            | 15050 |
| 6-311G(d,p)       | 1595        | 1421 | 7417             | 6972 | 17538            | 17015 |
| 6-311++G(3df,3pd) | 1572        | 1493 | 6870             | 6251 | 16793            | 15819 |
| cc-pVDZ           | 1252        | 1088 | 7050             | 6503 | 16204            | 15621 |
| cc-pVTZ           | 1486        | 1375 | 6972             | 6419 | 16907            | 16126 |
| cc-pVQZ           | 1580        | 1494 | 6978             | 6389 | 17088            | 16144 |
| <b>EXP.</b>       | <b>1886</b> |      | <b>6470</b>      |      | <b>15320</b>     |       |

**Gas phase vs. periodic model.** Since DFT calculations can be performed with periodic boundary conditions at affordable cost, periodic DFT calculations represent an essential part of the modeling of

crystalline solids. Table S3 lists NQCC values computed by the isolated and the periodic model, all else being equal – that is, the same B3LYP functional, the same basis set and the same molecular geometry (measured by ND) were used in both models. The results are discussed in Section 3.2.

**Table S3.** Comparison of NQCC values computed by an isolated and periodic model of PANO using the B3LYP functional and various basis sets. Experimental values are also listed.

| Basis set     | NQCC [kHz]  |       |                  |       |                  |       |
|---------------|-------------|-------|------------------|-------|------------------|-------|
|               | N           |       | O <sub>don</sub> |       | O <sub>acc</sub> |       |
|               | isolated    | solid | isolated         | solid | isolated         | solid |
| 6-31G         | 1316        | 1956  | 7507             | 7357  | 16739            | 16198 |
| 6-31G(d)      | 1365        | 1906  | 6882             | 6780  | 15777            | 15363 |
| 6-31G(d,p)    | 1358        | 1897  | 6858             | 6768  | 15831            | 15417 |
| 6-31G(2d,2p)  | 1324        | 1895  | 6599             | 6485  | 15675            | 15188 |
| 6-311G        | 1789        | 2474  | 8745             | 8294  | 18662            | 18067 |
| 6-311G(d)     | 1605        | 2238  | 7453             | 7273  | 17532            | 16967 |
| 6-311G(d,p)   | 1595        | 2224  | 7417             | 7237  | 17538            | 16979 |
| 6-311G(2d,2p) | 1558        | 2172  | 7345             | 7146  | 17382            | 16781 |
| cc-pVDZ       | 1252        | 1847  | 7050             | 6888  | 16204            | 15687 |
| cc-pVTZ       | 1486        | 2083  | 6972             | 6870  | 16907            | 16366 |
| <b>EXP.</b>   | <b>1886</b> |       | <b>6470</b>      |       | <b>15320</b>     |       |

**2D nuclear quantum treatment: potential energy surface.** Figure S1 shows the potential energy surface computed for crystalline PANO by varying the proton location ( $R_{OH}$ ) and donor...acceptor distance ( $R_{OO}$ ). The surface is typical of very short, asymmetric H-bonds with single well potentials. Accordingly, proton dynamics features large-amplitude displacements with pronounced nuclear quantum effects and significant coupling with other degrees of freedom, in the first place donor...acceptor oscillations. Nuclear quantum treatment along herein used coordinates has been routinely used in short H-bonds, imposing substantial effects on geometry and other observables, as discussed in Section 3.2.

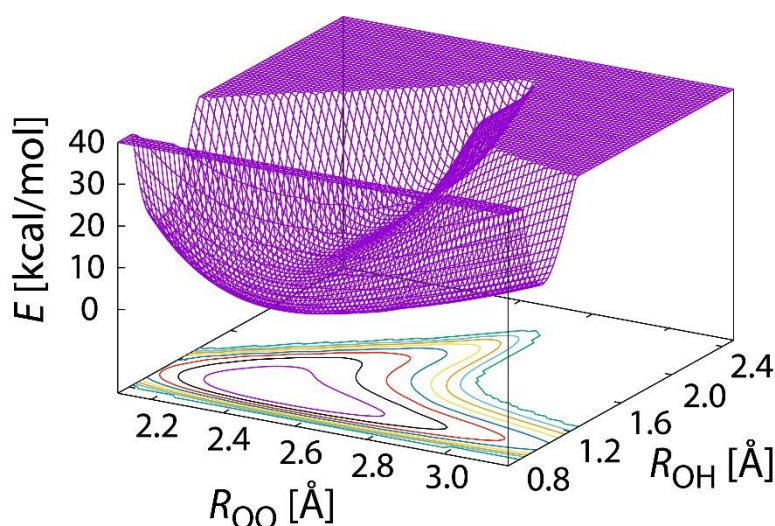

**Figure S1.** 2D potential energy surface in crystalline PANO computed at the B3LYP/6-31G(d,p) level along the O<sub>don</sub>...O<sub>acc</sub> ( $R_{OO}$ ) and O<sub>don</sub>-H ( $R_{OH}$ ) distance. The resolution of contours is 5 kcal/mol.
